# Supplementary material for: Shared genetic etiology between obsessive-compulsive disorder, obsessive-compulsive symptoms in the population, and insulin signaling
Source: PubMed Central journal article supplement (PMC7186226; doi:10.1038/s41398-020-0793-y), 2020-04-27
Supplement: 41398_2020_793_MOESM16_ESM.pdf [file 41398_2020_793_MOESM16_ESM.pdf]

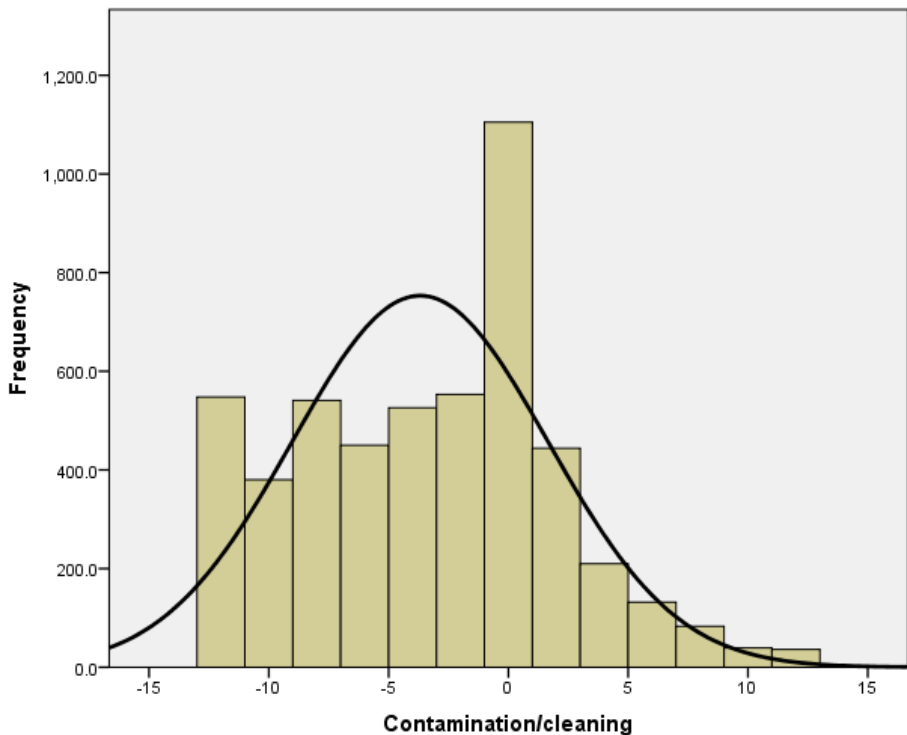

Supplementary Figure 4B. Histogram showing the distribution of the 'contamination/cleaning' score in 5047 children and adolescents aged 6-17 in the Spit for Science Cohort.
