# Supplementary material for: Shared genetic etiology between obsessive-compulsive disorder, obsessive-compulsive symptoms in the population, and insulin signaling
Source: PubMed Central journal article supplement (PMC7186226; doi:10.1038/s41398-020-0793-y), 2020-04-27
Supplement: 41398_2020_793_MOESM17_ESM.pdf [file 41398_2020_793_MOESM17_ESM.pdf]

**a Symmetry/counting/ordering** TOCS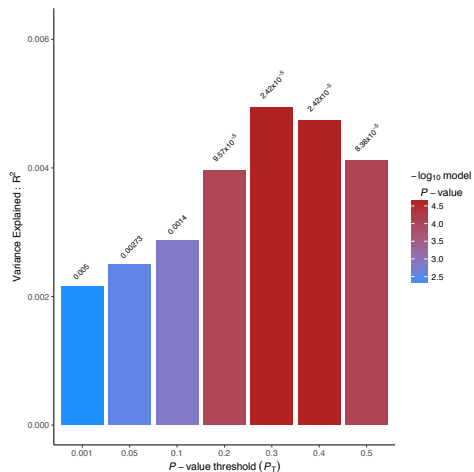**b Contamination/cleaning** TOCS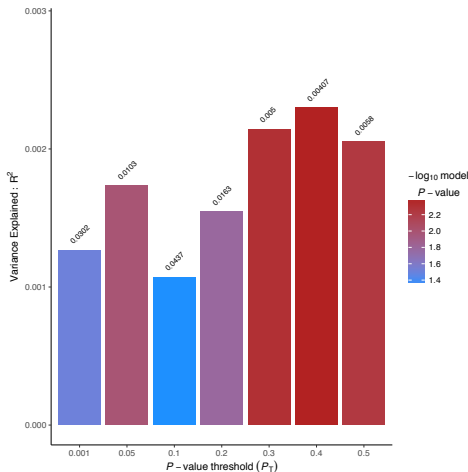

**Supplementary Figure 5A.** Bar plots from PRSice showing results at seven broad P-value thresholds ( $P_T$ ) for shared genetic etiology between obsessive-compulsive disorder (OCD) and two TOCS OCS factors (see Methods). The numbers above the bars indicate the P-values for shared genetic etiology, and these P-values were corrected using the Benjamini-Hochberg false discovery rate method.
